# Supplementary material for: Development and Design Perspective of a Model for Analyzing the Social Life Cycle of Public Organizations: Examination of Existing Models
Source: Preprints.org preprint supplement (doi:10.20944/preprints202407.1303.v1), 2024-07-16
Supplement: Supplementary file 1 [file supplementary]

Table 1: Total analysis sample (222 articles)

| **No** | **Title** | **Year** | **Journal** | **Authors** |
| --- | --- | --- | --- | --- |
| 1 | Social Life Cycle Assessment Used in Indigenous Contexts: A Critical Analysis | 2021 | SUSTAINABILITY | MacNeil, KS and Daniels-Mayes, S and Akbar, S and Marsh, J and Wik-Karlsson, J and Ossbo, A |
| 2 | Step-by-step social life cycle assessment framework: a participatory approach for the identification and prioritization of impact subcategories applied to mobility scenarios | 2021 | INTERNATIONAL JOURNAL OF LIFE CYCLE ASSESSMENT | Bouillass, G and Blanc, I and Perez-Lopez, P |
| 3 | An SLCA method-based framework of large-scale transportation infrastructure in China | 2022 | ENVIRONMENTAL IMPACT ASSESSMENT REVIEW | Yang, F and Yu, J and Li, XD and Qiu, WL |
| 4 | The count of what counts in the agri-food Social Life Cycle Assessment | 2022 | JOURNAL OF CLEANER PRODUCTION | Tragnone, BM and D'Eusanio, M and Petti, L |
| 5 | Social life cycle assessment methodology for evaluating production process design: Biorefinery case study | 2019 | JOURNAL OF CLEANER PRODUCTION | Cadena, E and Rocca, F and Gutierrez, JA and Carvalho, A |
| 6 | Social life-cycle assessment frameworks: a review of criteria and indicators proposed to assess social and socioeconomic impacts | 2018 | INTERNATIONAL JOURNAL OF LIFE CYCLE ASSESSMENT | Sureau, S and Mazijn, B and Garrido, SR and Achten, WMJ |
| 7 | Participation in S-LCA: A Methodological Proposal Applied to Belgian Alternative Food Chains (Part 1) | 2019 | RESOURCES-BASEL | Sureau, S and Lohest, F and Van Mol, J and Bauler, T and Achten, WMJ |
| 8 | Applying Social Life Cycle Assessment in the Thai Sugar Industry: Challenges from the field | 2018 | JOURNAL OF CLEANER PRODUCTION | Prasara-A, J and Gheewala, SH |
| 9 | Area of protection in S-LCA: human well-being or societal quality | 2019 | INTERNATIONAL JOURNAL OF LIFE CYCLE ASSESSMENT | Soltanpour, Y and Peri, I and Temri, L |
| 10 | Assessment and contributions of different Social Life Cycle Assessments performed in the agribusiness sector | 2015 | BIOTECHNOLOGIE AGRONOMIE SOCIETE ET ENVIRONNEMENT | Delcour, A and Van Stappen, F and Burny, P and Goffart, JP and Stilmant, D |
| 11 | Social life cycle assessment in Indian steel sector: a case study | 2018 | INTERNATIONAL JOURNAL OF LIFE CYCLE ASSESSMENT | Singh, RK and Gupta, U |
| 12 | Unveiling the social performance of selected agri-food chains in Costa Rica: the case of green coffee, raw milk and leafy vegetables | 2021 | INTERNATIONAL JOURNAL OF LIFE CYCLE ASSESSMENT | Brenes-Peralta, L and Jimenez-Morales, MF and Campos-Rodriguez, R and Vittuari, M |
| 13 | Social considerations for the cultivation of industrial crops on marginal agricultural land as feedstock for bioeconomy | 2022 | BIOFUELS BIOPRODUCTS & BIOREFINING-BIOFPR | Panoutsou, C and von Cossel, M and Ciria, P and Ciria, CS and Baraniecki, P and Monti, A and Zanetti, F and Dubois, JL |
| 14 | Social Organisational Life Cycle Assessment and Social Life Cycle Assessment: different twins? Correlations from a case study | 2022 | INTERNATIONAL JOURNAL OF LIFE CYCLE ASSESSMENT | D'Eusanio, M and Tragnone, BM and Petti, L |
| 15 | Application challenges for the social Life Cycle Assessment of fertilizers within life cycle sustainability assessment | 2014 | JOURNAL OF CLEANER PRODUCTION | Martinez-Blanco, J and Lehmann, A and Munoz, P and Anton, A and Traverso, M and Rieradevall, J and Finkbeiner, M |
| 16 | Social life cycle performance of additive manufacturing in the healthcare industry: the orthosis and prosthesis cases | 2021 | INTERNATIONAL JOURNAL OF COMPUTER INTEGRATED MANUFACTURING | Soares, B and Ribeiro, I and Cardeal, G and Leite, M and Carvalho, H |
| 17 | A social impact quantification framework for the resource extraction industry | 2019 | INTERNATIONAL JOURNAL OF LIFE CYCLE ASSESSMENT | Wu, SR and Celik, I and Apul, D and Chen, JQ |
| 18 | Enhancing comprehensive measurement of social impacts in S-LCA by including environmental and economic aspects | 2018 | INTERNATIONAL JOURNAL OF LIFE CYCLE ASSESSMENT | Zimdars, C and Haas, A and Pfister, S |
| 19 | Applying social life cycle assessment to evaluate the use phase of mobility services: a case study in Berlin | 2022 | INTERNATIONAL JOURNAL OF LIFE CYCLE ASSESSMENT | Gompf, K and Traverso, M and Hetterich, J |
| 20 | Social life-cycle assessment (S-LCA) of residential rooftop solar panels using challenge-derived framework | 2022 | ENERGY SUSTAINABILITY AND SOCIETY | Bonilla-Alicea, RJ and Fu, K |
| 21 | Analysis of the main elements affecting social LCA applications: challenges for the automotive sector | 2018 | INTERNATIONAL JOURNAL OF LIFE CYCLE ASSESSMENT | Zanchi, L and Delogu, M and Zamagni, A and Pierini, M |
| 22 | Developing social life cycle assessment based on corporate social responsibility: A chemical process industry case regarding human rights | 2021 | TECHNOLOGICAL FORECASTING AND SOCIAL CHANGE | Tsalidis, GA and de Santo, E and Gallart, JJE and Corbera, JB and Blanco, FC and Pesch, U and Korevaar, G |
| 23 | On the possibilities of multilevel analysis to cover data gaps in consequential S-LCA: Case of multistory residential building | 2022 | JOURNAL OF CLEANER PRODUCTION | Fauzi, RT and Lavoie, P and Tanguy, A and Amor, B |
| 24 | Using Social Life Cycle Assessment to analyze the contribution of products to the Sustainable Development Goals: a case study in the textile sector | 2020 | INTERNATIONAL JOURNAL OF LIFE CYCLE ASSESSMENT | Almanza, AMH and Corona, B |
| 25 | Social impacts of large-scale hydropower project in Myanmar: a social life cycle assessment of Shweli hydropower dam 1 | 2021 | INTERNATIONAL JOURNAL OF LIFE CYCLE ASSESSMENT | Aung, TS and Fischer, TB and Azmi, AS |
| 26 | Social Life Cycle Assessment in the Textile Sector: An Italian Case Study | 2017 | SUSTAINABILITY | Lenzo, P and Traverso, M and Salomone, R and Ioppolo, G |
| 27 | Social life cycle assessment of the nanoscale zero-valent iron synthesis process for application in contaminated site remediation | 2022 | ENVIRONMENTAL SCIENCE AND POLLUTION RESEARCH | Visentin, C and Trentin, AWD and Braun, AB and Thome, A |
| 28 | An integrated social life cycle assessment of freight transport systems | 2020 | INTERNATIONAL JOURNAL OF LIFE CYCLE ASSESSMENT | Osorio-Tejada, JL and Llera-Sastresa, E and Scaperllini, S and Hashim, AH |
| 29 | Social hotspots life cycle assessment: A case study on social risks of an antimicrobial keyboard cover | 2021 | JOURNAL OF CLEANER PRODUCTION | Pucciarelli, M and Traverso, M and Lettieri, P |
| 30 | Modeling life-cycle social assessment in sustainable pavement management at project level | 2020 | INTERNATIONAL JOURNAL OF LIFE CYCLE ASSESSMENT | Zheng, XY and Easa, SM and Ji, T and Jiang, ZL |
| 31 | The role of manufacturing in affecting the social dimension of sustainability | 2016 | CIRP ANNALS-MANUFACTURING TECHNOLOGY | Sutherland, JW and Richter, JS and Hutchins, MJ and Dornfeld, D and Dzombak, R and Mangold, J and Robinson, S and Hauschild, MZ and Bonou, A and Schonsleben, P and Friemann, F |
| 32 | Testing environmental and social indicators for biorefineries: bioethanol and biochemical production | 2018 | INTERNATIONAL JOURNAL OF LIFE CYCLE ASSESSMENT | Valente, C and Brekke, A and Modahl, IS |
| 33 | Participatory approach for pertinent impact subcategory identification: Local community | 2021 | INTERNATIONAL JOURNAL OF LIFE CYCLE ASSESSMENT | do Carmo, BBT and Castro, GD and Goncalo, TEE and Ugaya, CML |
| 34 | Social LCA for rare earth NdFeB permanent magnets | 2019 | SUSTAINABLE PRODUCTION AND CONSUMPTION | Werker, J and Wulf, C and Zapp, P and Schreiber, A and Marx, J |
| 35 | Assessing the social impacts of nano-enabled products through the life cycle: the case of nano-enabled biocidal paint | 2018 | INTERNATIONAL JOURNAL OF LIFE CYCLE ASSESSMENT | Subramanian, V and Semenzin, E and Zabeo, A and Saling, P and Ligthart, T and van Harmelen, T and Malsch, I and Hristozov, D and Marcomini, A |
| 36 | Social Hotspot Analysis and Trade Policy Implications of the Use of Bioelectrochemical Systems for Resource Recovery from Wastewater | 2018 | SUSTAINABILITY | Shemfe, MB and Gadkari, S and Sadhukhan, J |
| 37 | Integrating the Social Impacts into Risk Governance of Nanotechnology | 2016 | MANAGING RISK IN NANOTECHNOLOGY: TOPICS IN GOVERNANCE, ASSURANCE AND TRANSFER | Subramanian, V and Semenzin, E and Zabeo, A and Hristozov, D and Malsch, I and Saling, P and Van Harmelen, T and Ligthart, T and Marcomini, A |
| 38 | Social Organizational Life Cycle Assessment of Transport Services: Case Studies in Colombia, Spain, and Malaysia | 2022 | SUSTAINABILITY | Osorio-Tejada, JL and Llera-Sastresa, E and Scarpellini, S and Morales-Pinzon, T |
| 39 | Environmental and social impact assessment of cultural heritage restoration and its application to the Uncastillo Fortress | 2019 | INTERNATIONAL JOURNAL OF LIFE CYCLE ASSESSMENT | Khorassani, SM and Ferrari, AM and Pini, M and Blundo, DS and Muina, FEG and Garcia, JF |
| 40 | Social implications of palm oil production through social life cycle perspectives in Johor, Malaysia | 2019 | INTERNATIONAL JOURNAL OF LIFE CYCLE ASSESSMENT | Muhammad, KI and Sharaai, AH and Ismail, MM and Harun, R and Yien, WS |
| 41 | Environmental, social, and economic assessment of energy utilization of crop residue in China | 2021 | FRONTIERS IN ENERGY | Zhang, YL and Li, JJ and Liu, H and Zhao, GL and Tian, YJ and Xie, KC |
| 42 | Social Life Cycle Assessment of Major Staple Grain Crops in China | 2022 | AGRICULTURE-BASEL | Wei, JN and Cui, JX and Xu, YA and Li, JN and Lei, XY and Gao, WS and Chen, YQ |
| 43 | From social impact subcategories to human health: an application of multivariate analysis on S-LCA | 2021 | INTERNATIONAL JOURNAL OF LIFE CYCLE ASSESSMENT | de Araujo, JB and Frega, JR and Ugaya, CML |
| 44 | Social Life-Cycle Assessment of Household Waste Management System in Kabul City | 2020 | SUSTAINABILITY | Azimi, AN and Dente, SMR and Hashimoto, S |
| 45 | An assessment of social sustainability of sugarcane and cassava cultivation in Thailand | 2021 | SUSTAINABLE PRODUCTION AND CONSUMPTION | Prasara-A, J and Gheewala, SH |
| 46 | The assessment of positive impacts in LCA of products | 2021 | INTERNATIONAL JOURNAL OF LIFE CYCLE ASSESSMENT | Croes, PR and Vermeulen, WJV |
| 47 | Locating Hotspots for the Social Life Cycle Assessment of Bio-Based Products from Short Rotation Coppice | 2021 | BIOENERGY RESEARCH | Furtner, D and Ranacher, L and Echenique, EAP and Schwarzbauer, P and Hesser, F |
| 48 | Principles for the application of life cycle sustainability assessment | 2021 | INTERNATIONAL JOURNAL OF LIFE CYCLE ASSESSMENT | Valdivia, S and Backes, JG and Traverso, M and Sonnemann, G and Cucurachi, S and Guinee, JB and Schaubroeck, T and Finkbeiner, M and Leroy-Parmentier, N and Ugaya, C and Pena, C and Zamagni, A and Inaba, A and Amaral, M and Berger, M and Dvarioniene, J and Vakhitova, T and Benoit-Norris, C and Prox, M and Foolmaun, R and Goedkoop, M |
| 49 | The environmental and social footprint of the university of the Basque Country UPV/EHU | 2021 | JOURNAL OF CLEANER PRODUCTION | Bueno, G and de Blas, M and Perez-Iribarren, E and Zuazo, I and Torre-Pascual, E and Erauskin, A and Etxano, I and Tamayo, U and Garcia, M and Akizu-Gardoki, O and Leon, I and Marieta, C and Zulueta, G and Barrio, I |
| 50 | Subcategory assessment method for social life cycle assessment. Part 1: methodological framework | 2014 | INTERNATIONAL JOURNAL OF LIFE CYCLE ASSESSMENT | Ramirez, PKS and Petti, L and Haberland, NT and Ugaya, CML |
| 51 | Comparative life cycle assessment and social life cycle assessment of used polyethylene terephthalate (PET) bottles in Mauritius | 2013 | International Journal of Life Cycle Assessment | Foolmaun, R.K. and Ramjeeawon, T. |
| 52 | Social Life Cycle Assessment of Green and Burnt Manual Sugarcane Harvesting in the Northeastern Thailand | 2022 | Environment and Natural Resources Journal | Thuayjan, T. and Prasara-A, J. and Boonkum, P. and Gheewala, S.H. |
| 53 | Social life cycle assessment and participatory approaches: A methodological proposal applied to citrus farming in Southern Italy | 2015 | Integrated Environmental Assessment and Management | De Luca, A.I. and Iofrida, N. and Strano, A. and Falcone, G. and Gulisano, G. |
| 54 | Potential hotspots identified by social LCA-Part 2: Reflections on a study of a complex product | 2013 | International Journal of Life Cycle Assessment | Ekener-Petersen, E. and Moberg, Å. |
| 55 | A social life cycle assessment of vanadium redox flow and lithium-ion batteries for energy storage | 2022 | Journal of Industrial Ecology | Koese, M. and Blanco, C.F. and Vert, V.B. and Vijver, M.G. |
| 56 | A UNEP/SETAC approach towards a life cycle sustainability assessment - Our contribution to Rio+20 | 2013 | International Journal of Life Cycle Assessment | Valdivia, S. and Ugaya, C.M.L. and Hildenbrand, J. and Traverso, M. and Mazijn, B. and Sonnemann, G. |
| 57 | Sustainable Valorisation of Animal Manures via Thermochemical Conversion Technologies: An Inclusive Review on Recent Trends | 2022 | Waste and Biomass Valorization | Rout, P.R. and Pandey, D.S. and Haynes-Parry, M. and Briggs, C. and Manuel, H.L.C. and Umapathi, R. and Mukherjee, S. and Panigrahi, S. and Goel, M. |
| 58 | A social sustainability assessment model for manufacturing company based on S-LcA | 2019 | International Journal of Sustainable Development and Planning | Shi, J. and Wang, Y. and Ma, Q. and Fan, S. and Jin, H. and Liu, H. and Liu, H. |
| 59 | The Social Impact Study through the Life Cycle of Rice Production at Selangor, Malaysia | 2022 | Chemical Engineering Transactions | Sharaai, A.H. and Masri, M.F. and Kalvani, S.R. |
| 60 | Towards social life cycle assessment of mobility services: systematic literature review and the way forward | 2020 | International Journal of Life Cycle Assessment | Gompf, K. and Traverso, M. and Hetterich, J. |
| 61 | Social impact evaluation of tea production using social life cycle assessment (s-lca) method in cameron highlands, pahang, Malaysia | 2019 | Planning Malaysia | Sharaai, A.H. and Muhammad, K.I. and Wah, Y.G. |
| 62 | Social Life Cycle Inventory for Pavements – A Case Study of South Africa | 2021 | Transportation Engineering | Blaauw, S.A. and Maina, J.W. and Grobler, L.J. |
| 63 | The energy-mineral-society nexus - A social LCA model | 2018 | APPLIED ENERGY | Schlor, H and Venghaus, S and Zapp, P and Marx, J and Schreiber, A and Hake, JF |
| 64 | Extended community of peers and robustness of social LCA | 2018 | INTERNATIONAL JOURNAL OF LIFE CYCLE ASSESSMENT | Macombe, C and Loeillet, D and Gillet, C |
| 65 | Critique of selected peer-reviewed publications on applied social life cycle assessment: focus on cases from developing countries | 2019 | CLEAN TECHNOLOGIES AND ENVIRONMENTAL POLICY | Venkatesh, G |
| 66 | Life Cycle Assessment in Market, Research, and Policy: Harmonization Beyond Standardization | 2015 | INTEGRATED ENVIRONMENTAL ASSESSMENT AND MANAGEMENT | Zamagni, A and Cutaia, L |
| 67 | Social life cycle assessment of average Irish dairy farm | 2017 | INTERNATIONAL JOURNAL OF LIFE CYCLE ASSESSMENT | Chen, WH and Holden, NM |
| 68 | Addressing positive impacts in social LCA-discussing current and new approaches exemplified by the case of vehicle fuels | 2018 | INTERNATIONAL JOURNAL OF LIFE CYCLE ASSESSMENT | Ekener, E and Hansson, J and Gustavsson, M |
| 69 | A social LCA framework to assess the corporate social profile of companies: Insights from a case study | 2017 | JOURNAL OF CLEANER PRODUCTION | Tsalis, T and Avramidou, A and Nikolaou, IE |
| 70 | Development of a methodological framework for social life-cycle assessment of novel technologies | 2017 | INTERNATIONAL JOURNAL OF LIFE CYCLE ASSESSMENT | van Haaster, B and Ciroth, A and Fontes, J and Wood, R and Ramirez, A |
| 71 | Back to basics-the school lunch | 2018 | INTERNATIONAL JOURNAL OF LIFE CYCLE ASSESSMENT | Wangel, A |
| 72 | Life Cycle Sustainability Assessment: A Tool for Exercising Due Diligence in Life Cycle Management | 2015 | LIFE CYCLE MANAGEMENT | Mazijn, B and Reveret, JP |
| 73 | Social organizational LCA (SOLCA)-a new approach for implementing social LCA | 2015 | INTERNATIONAL JOURNAL OF LIFE CYCLE ASSESSMENT | Martinez-Blanco, J and Lehmann, A and Chang, YJ and Finkbeiner, M |
| 74 | Social-LCA. Methodological Proposal Applied to Physical Activity Program Implementation into Old People's Routines | 2020 | SUSTAINABILITY | Flor-Montalvo, FJ and Garcia-Alcaraz, JL and Ledesma, AST and Alvarez-Kurogi, L |
| 75 | Analyzing the Potential Environmental and Socio-Economic Impacts of Regional Energy Integration Scenarios of a Bio-Based Industrial Network | 2022 | SUSTAINABILITY | Bezama, A and Hildebrandt, J and Thran, D |
| 76 | Environmental and Social Pressures in Mining. Results from a Sustainability Hotspots Screening | 2018 | RESOURCES-BASEL | Di Noi, C and Ciroth, A |
| 77 | Evaluating sustainability impacts of critical mineral extractions: Integration of life cycle sustainability assessment and SDGs frameworks |  | JOURNAL OF INDUSTRIAL ECOLOGY | Agusdinata, DB and Liu, WJ and Sulistyo, S and LeBillon, P and Wegner, J |
| 78 | Lessons Learned from a Life Cycle Sustainability Assessment of Rare Earth Permanent Magnets | 2017 | JOURNAL OF INDUSTRIAL ECOLOGY | Wulf, C and Zapp, P and Schreiber, A and Marx, J and Schlor, H |
| 79 | Integrated life cycle sustainability assessment using fuzzy inference: A novel FELICITA model | 2018 | SUSTAINABLE PRODUCTION AND CONSUMPTION | Kouloumpis, V and Azapagic, A |
| 80 | Inventory Analysis and Social Life Cycle Assessment of Greenhouse Gas Emissions from Waste-to-Energy Incineration in Taiwan | 2017 | SUSTAINABILITY | Lu, YT and Lee, YM and Hong, CY |
| 81 | How Do Chain Governance and Fair Trade Matter? A S-LCA Methodological Proposal Applied to Food Products from Belgian Alternative Chains (Part 2) | 2019 | RESOURCES-BASEL | Sureau, S and Lohest, F and Van Mol, J and Bauler, T and Achten, WMJ |
| 82 | The International Standards as the Constitution of Life Cycle Assessment: The ISO 14040 Series and its Offspring | 2014 | BACKGROUND AND FUTURE PROSPECTS IN LIFE CYCLE ASSESSMENT | Finkbeiner, M |
| 83 | Abiotic resource use in life cycle impact assessment-Part I- towards a common perspective | 2020 | RESOURCES CONSERVATION AND RECYCLING | Schulze, R and Guinee, J and van Oers, L and Alvarenga, R and Dewulf, J and Drielsma, J |
| 84 | Life cycle sustainability assessment analysis of different concrete construction techniques for residential building in Malaysia | 2021 | INTERNATIONAL JOURNAL OF LIFE CYCLE ASSESSMENT | Balasbaneh, AT and Sher, W |
| 85 | Social Organizational Life Cycle Assessment: an approach for identification of relevant subcategories for wine production in Italy | 2020 | INTERNATIONAL JOURNAL OF LIFE CYCLE ASSESSMENT | D'Eusanio, M and Lehmann, A and Finkbeiner, M and Petti, L |
| 86 | Life cycle assessment (LCA) of urban water infrastructure: emerging approaches to balance objectives and inform comprehensive decision-making | 2017 | ENVIRONMENTAL SCIENCE-WATER RESEARCH & TECHNOLOGY | Byrne, DM and Lohman, HAC and Cook, SM and Peters, GM and Guest, JS |
| 87 | Economic, environmental, and social impacts of different sugarcane production systems | 2018 | BIOFUELS BIOPRODUCTS & BIOREFINING-BIOFPR | Cardoso, TF and Watanabe, MDB and Souza, A and Chagas, MF and Cavalett, O and Morais, ER and Nogueira, LAH and Leal, MRLV and Braunbeck, OA and Cortez, LAB and Bonomi, A |
| 88 | Toward an Overall Analytical Framework for the Integrated Sustainability Assessment of the Production and Supply of Raw Materials and Primary Energy Carriers | 2015 | JOURNAL OF INDUSTRIAL ECOLOGY | Dewulf, J and Mancini, L and Blengini, GA and Sala, S and Latunussa, C and Pennington, D |
| 89 | The Need for a Preference-Based Multicriteria Prioritization Framework in Life Cycle Sustainability Assessment | 2017 | JOURNAL OF INDUSTRIAL ECOLOGY | Grubert, E |
| 90 | Life cycle sustainability assessment of a novel slaughter concept | 2020 | JOURNAL OF CLEANER PRODUCTION | Valente, C and Moller, H and Johnsen, FM and Saxegard, S and Brunsdon, ER and Alvseike, OA |
| 91 | Assessment of health and comfort criteria in a life cycle social context: Application to buildings for higher education | 2017 | BUILDING AND ENVIRONMENT | Santos, P and Pereira, AC and Gervasio, H and Bettencourt, A and Mateus, D |
| 92 | Holistic approach in the evaluation of the sustainability of bio-based products: An Integrated Assessment Tool | 2021 | SUSTAINABLE PRODUCTION AND CONSUMPTION | Ladu, L and Morone, P |
| 93 | Comparative life cycle social assessment of buildings: health and comfort criterion | 2016 | MATERIAUX & TECHNIQUES | Santos, P and Gervasio, H and Pereira, A and da Silva, LS and Bettencourt, A |
| 94 | Adjusting the social footprint methodology based on findings of subjective wellbeing research | 2023 | INTERNATIONAL JOURNAL OF LIFE CYCLE ASSESSMENT | Weidema, BP |
| 95 | A comparison of Multi-Regional Input-Output databases regarding transaction structure and supply chain analysis | 2018 | JOURNAL OF CLEANER PRODUCTION | Tarne, P and Lehmann, A and Finkbeiner, M |
| 96 | A method for human health impact assessment in social LCA: lessons from three case studies | 2018 | INTERNATIONAL JOURNAL OF LIFE CYCLE ASSESSMENT | Arvidsson, R and Hildenbrand, J and Baumann, H and Islam, K and Parsmo, R |
| 97 | Life cycle impacts of three-way ceramic honeycomb catalytic converter in terms of disability adjusted life year | 2018 | JOURNAL OF CLEANER PRODUCTION | Islam, KMN and Hildenbrand, J and Hossain, MM |
| 98 | Using life cycle sustainability assessment to trade off sourcing strategies for humanitarian relief items | 2017 | INTERNATIONAL JOURNAL OF LIFE CYCLE ASSESSMENT | van Kempen, EA and Spiliotopoulou, E and Stojanovski, G and de Leeuw, S |
| 99 | In search of income reference points for SLCA using a country level sustainability benchmark (part 2): fair minimum wage. A contribution to the Oiconomy project | 2016 | INTERNATIONAL JOURNAL OF LIFE CYCLE ASSESSMENT | Croes, PR and Vermeulen, WJV |
| 100 | The social footprint-a practical approach to comprehensive and consistent social LCA | 2018 | INTERNATIONAL JOURNAL OF LIFE CYCLE ASSESSMENT | Weidema, B |
| 101 | Anticipating impacts on health based on changes in income inequality caused by life cycles | 2015 | INTERNATIONAL JOURNAL OF LIFE CYCLE ASSESSMENT | Bocoum, I and Macombe, C and Reveret, JP |
| 102 | The Olive-Oil Chain of Salerno Province (Southern Italy): A Life Cycle Sustainability Framework | 2022 | HORTICULTURAE | Maffia, A and Palese, AM and Pergola, M and Altieri, G and Celano, G |
| 103 | Social Life Cycle Assessment Application: Stakeholder Implication in the Cultural Heritage Sector | 2015 | SOCIAL LIFE CYCLE ASSESSMENT: AN INSIGHT | Arcese, G and Di Pietro, L and Mugion, RG |
| 104 | The UNEP/SETAC Life Cycle Initiative | 2014 | BACKGROUND AND FUTURE PROSPECTS IN LIFE CYCLE ASSESSMENT | Sonnemann, G and Valdivia, S |
| 105 | Social sustainability in trade and development policy | 2018 | INTERNATIONAL JOURNAL OF LIFE CYCLE ASSESSMENT | Pelletier, N and Ustaoglu, E and Benoit, C and Norris, G and Rosenbaum, E and Vasta, A and Sala, S |
| 106 | Investigating fairness in global supply chains: applying an extension of the living wage to the Western European clothing supply chain | 2018 | INTERNATIONAL JOURNAL OF LIFE CYCLE ASSESSMENT | Mair, S and Druckman, A and Jackson, T |
| 107 | Modeling socioeconomic pathways to assess sustainability: a tailored development for housing retrofit | 2018 | INTERNATIONAL JOURNAL OF LIFE CYCLE ASSESSMENT | Touceda, M and Neila, F and Degrez, M |
| 108 | Partial Organization and Social LCA Development: The Creation and Expansion of an Epistemic Community | 2015 | SOCIAL LIFE CYCLE ASSESSMENT: AN INSIGHT | Norris, CB and Reveret, JP |
| 109 | Quantification of corruption in preventative cost-based S-LCA: a contribution to the Oiconomy project | 2019 | INTERNATIONAL JOURNAL OF LIFE CYCLE ASSESSMENT | Croes, PR and Vermeulen, WJV |
| 110 | A triple bottom line evaluation of solid waste management strategies: a case study for an arid Gulf State, Kuwait | 2018 | INTERNATIONAL JOURNAL OF LIFE CYCLE ASSESSMENT | Aleisa, E and Al-Jarallah, R |
| 111 | Social life cycle assessment framework for evaluation of potential job creation with an application in the French carbon fiber aeronautical recycling sector | 2019 | INTERNATIONAL JOURNAL OF LIFE CYCLE ASSESSMENT | Pillain, B and Viana, LR and Lefeuvre, A and Jacquemin, L and Sonnemann, G |
| 112 | Socioeconomic LCA of Milk Production in Canada | 2015 | SOCIAL LIFE CYCLE ASSESSMENT: AN INSIGHT | Reveret, JP and Couture, JM and Parent, J |
| 113 | Toward a computational structure for life cycle sustainability analysis: Unifying LCA and LCC | 2013 | International Journal of Life Cycle Assessment | Heijungs, R. and Settanni, E. and Guinée, J. |
| 114 | The approach of multi-factor life cycle assessment and product structure optimization | 2003 | Computer Aided Chemical Engineering | Zheng, X. and Hu, S. and Li, Y. and Shen, J. |
| 115 | A framework for social life cycle impact assessment | 2006 | International Journal of Life Cycle Assessment | Dreyer, L.C. and Hauschild, M.Z. and Schierbeck, J. |
| 116 | Defining the baseline in social life cycle assessment | 2010 | International Journal of Life Cycle Assessment | Jørgensen, A. and Finkbeiner, M. and Jørgensen, M.S. and Hauschild, M.Z. |
| 117 | Metrics for the sustainability value of steel | 2014 | Materiaux et Techniques | Thomas, J.S. and Carvallo, A. and Birat, J.P. |
| 118 | Designing the social life cycle of products from the systematic competitive model | 2013 | International Journal of Life Cycle Assessment | Lagarde, V. and MacOmbe, C. |
| 119 | A conceptual framework for impact assessment within SLCA | 2011 | International Journal of Life Cycle Assessment | Reitinger, C. and Dumke, M. and Barosevcic, M. and Hillerbrand, R. |
| 120 | A literature review of type I SLCA—making the logic underlying methodological choices explicit | 2018 | International Journal of Life Cycle Assessment | Russo Garrido, S. and Parent, J. and Beaulieu, L. and Revéret, J.-P. |
| 121 | Towards life cycle sustainability assessment: An implementation to photovoltaic modules | 2012 | International Journal of Life Cycle Assessment | Traverso, M. and Asdrubali, F. and Francia, A. and Finkbeiner, M. |
| 122 | Assessing social impacts in a life cycle perspective-Lessons learned | 2008 | CIRP Annals - Manufacturing Technology | Hauschild, M.Z. and Dreyer, L.C. and Jørgensen, A. |
| 123 | Life cycle attribute assessment: Case study of Quebec greenhouse tomatoes | 2009 | Journal of Industrial Ecology | Andrews, E. and Lesage, P. and Benoît, C. and Parent, J. and Norris, G. and Revéret, J.-P. |
| 124 | Life cycle sustainability assessment in the context of sustainability science progress (part 2) | 2013 | International Journal of Life Cycle Assessment | Sala, S. and Farioli, F. and Zamagni, A. |
| 125 | An extended life cycle analysis of packaging systems for fruit and vegetable transport in Europe | 2013 | International Journal of Life Cycle Assessment | Albrecht, S. and Brandstetter, P. and Beck, T. and Fullana-I-Palmer, P. and Grönman, K. and Baitz, M. and Deimling, S. and Sandilands, J. and Fischer, M. |
| 126 | Social impact assessment in LCA using the Preston pathway: The case of banana industry in Cameroon | 2013 | International Journal of Life Cycle Assessment | Feschet, P. and MacOmbe, C. and Garrabé, M. and Loeillet, D. and Saez, A.R. and Benhmad, F. |
| 127 | Addressing the contributions of electricity from biomass in Brazil in the context of the Sustainable Development Goals using life cycle assessment methods | 2022 | Journal of Industrial Ecology | Souza, N.R.D.D. and Souza, A. and Ferreira Chagas, M. and Hernandes, T.A.D. and Cavalett, O. |
| 128 | METHODOLOGY OF LIFE CYCLE SUSTAINABILITY ASSESSMENT | 2019 | Proceedings on Engineering Sciences | Nikolić, D. and Jovanović, S. and Skerlić, J. and Šušteršič, V. and Radulović, J. |
| 129 | Environmental management of companies in the oil and gas markets based on AI for sustainable development: An international review | 2022 | Frontiers in Environmental Science | Chutcheva, Y.V. and Kuprianova, L.M. and Seregina, A.A. and Kukushkin, S.N. |
| 130 | How to define the system in social life cycle assessments? A critical review of the state of the art and identification of needed developments | 2018 | International Journal of Life Cycle Assessment | Dubois-Iorgulescu, A.-M. and Saraiva, A.K.E.B. and Valle, R. and Rodrigues, L.M. |
| 131 | Evaluation of a challenge-derived social life cycle assessment (S-LCA) framework | 2021 | INTERNATIONAL JOURNAL OF SUSTAINABLE ENGINEERING | Bonilla-Alicea, RJ and Fu, K |
| 132 | Sustainability Performance of an Italian Textile Product | 2018 | ECONOMIES | Lenzo, P and Traverso, M and Mondello, G and Salomone, R and Ioppolo, G |
| 133 | Assessment of social dimension of a jar of honey: A methodological outline | 2018 | JOURNAL OF CLEANER PRODUCTION | D'Eusanio, M and Serreli, M and Zamagni, A and Petti, L |
| 134 | Life cycle sustainability analysis applied to an innovative configuration of concentrated solar power | 2019 | INTERNATIONAL JOURNAL OF LIFE CYCLE ASSESSMENT | Corona, B and San Miguel, G |
| 135 | Improving sustainable cultural heritage restoration work through life cycle assessment based model | 2018 | JOURNAL OF CULTURAL HERITAGE | Blundo, DS and Ferrari, AM and Fernandez del Hoyo, A and Riccardi, MP and Muina, FEG |
| 136 | MULTIDISCIPLINARY AND INNOVATIVE METHODOLOGIES FOR SUSTAINABLE MANAGEMENT IN AGRICULTURAL SYSTEMS | 2015 | ENVIRONMENTAL ENGINEERING AND MANAGEMENT JOURNAL | De Luca, AI and Molari, G and Seddaiu, G and Toscano, A and Bombino, G and Ledda, L and Milani, M and Vittuari, M |
| 137 | Environmental and social life cycle assessment of urban water systems: The case of Mexico City | 2019 | SCIENCE OF THE TOTAL ENVIRONMENT | Garcia-Sanchez, M and Guereca, LP |
| 138 | Cumulative energy demand in LCA: the energy harvested approach | 2015 | INTERNATIONAL JOURNAL OF LIFE CYCLE ASSESSMENT | Frischknecht, R and Wyss, F and Knopfel, SB and Lutzkendorf, T and Balouktsi, M |
| 139 | Complementing social life cycle assessment to reach sustainable development goals - A case study from the malaysian oil palm industry | 2021 | Chemical Engineering Transactions | Haryati, Z. and Subramaniam, V. and Noor, Z.Z. and Loh, S.K. and Aziz, A.A. |
| 140 | Application of LCSA to used cooking oil waste management | 2013 | International Journal of Life Cycle Assessment | Vinyes, E. and Oliver-Solà, J. and Ugaya, C. and Rieradevall, J. and Gasol, C.M. |
| 141 | 'Socializing' sustainability: a critical review on current development status of social life cycle impact assessment method | 2015 | Clean Technologies and Environmental Policy | Chhipi-Shrestha, G.K. and Hewage, K. and Sadiq, R. |
| 142 | From Social Accountability 8000 (SA8000) to Social Organisational Life Cycle Assessment (SO-LCA): An Evaluation of the Working Conditions of an Italian Wine-Producing Supply Chain | 2022 | SUSTAINABILITY | D'Eusanio, M and Tragnone, BM and Petti, L |
| 143 | Social organisational LCA for the academic activity of the University of the Basque Country UPV/EHU | 2021 | INTERNATIONAL JOURNAL OF LIFE CYCLE ASSESSMENT | Erauskin-Tolosa, A and Bueno, G and Etxano, I and Tamayo, U and Garcia, M and de Blas, M and Perez-Iribarren, E and Zuazo, I and Torre-Pascual, E and Akizu-Gardoki, O |
| 144 | Creating Social Handprints: Method and Case Study in the Electronic Computer Manufacturing Industry | 2019 | RESOURCES-BASEL | Norris, CB and Norris, GA and Azuero, L and Pflueger, J |
| 145 | Method name: Dynamic Social Organizational Life Cycle Assessment Keywords: Article history: Received 19 January 2022; Accepted 1 April 2022; Available online 9 April 2022 | 2022 | METHODSX | Garcia-Muina, F and Medina-Salgado, MS and Gonzalez-Sanchez, R and Huertas-Valdivia, I and Ferrari, AM and Settembre-Blundo, D |
| 146 | Life-cycle Assessment-based Environmental Impact Estimation Model for Earthwork-type Road Projects in the Design Phase | 2019 | KSCE JOURNAL OF CIVIL ENGINEERING | Park, JY and Kim, BS |
| 147 | Industry 4.0-based dynamic Social Organizational Life Cycle Assessment to target the social circular economy in manufacturing | 2021 | JOURNAL OF CLEANER PRODUCTION | Garcia-Muina, F and Medina-Salgado, MS and Gonzalez-Sanchez, R and Huertas-Valdivia, I and Ferrari, AM and Settembre-Blundo, D |
| 148 | Social Organizational Life Cycle Assessment (SO-LCA) and Organization 4.0: An easy-to-implement method | 2022 | MethodsX | García-Muiña, F. and Medina-Salgado, M.S. and González-Sánchez, R. and Huertas-Valdivia, I. and Ferrari, A.M. and Settembre-Blundo, D. |
| 149 | Social Life-Cycle Assessment for Building Materials | 2020 | EXAMINING THE ENVIRONMENTAL IMPACTS OF MATERIALS AND BUILDINGS | Kutschke, L |
| 150 | Implementing the guidelines for social life cycle assessment: past, present, and future | 2020 | INTERNATIONAL JOURNAL OF LIFE CYCLE ASSESSMENT | Tokede, O and Traverso, M |
| 151 | Assessing WELBY Social Life Cycle Assessment Approach through Cobalt Mining Case Study | 2022 | SUSTAINABILITY | Orola, A and Harri, A and Levanen, J and Uusitalo, V and Olsen, SI |
| 152 | S-LCA Indicators as Employee Motivation Factors | 2021 | EUROPEAN JOURNAL OF SUSTAINABLE DEVELOPMENT | Vavra, J and Patak, M and Kostalova, J and Bednarikova, M |
| 153 | Can S-LCA methodology support responsible sourcing of raw materials in EU policy context? | 2020 | INTERNATIONAL JOURNAL OF LIFE CYCLE ASSESSMENT | Di Noi, C and Ciroth, A and Mancini, L and Eynard, U and Pennington, D and Blengini, GA |
| 154 | Analysis of the Characteristics of Environmental Impacts According to the Cut-Off Criteria Applicable to the Streamlined Life Cycle Assessment (S-LCA) of Apartment Buildings in South Korea | 2021 | SUSTAINABILITY | Kim, R and Lim, MK and Roh, S and Park, WJ |
| 155 | The living wage gap-a quantitative measure of poverty in global supply chains | 2021 | INTERNATIONAL JOURNAL OF LIFE CYCLE ASSESSMENT | Hall, MR |
| 156 | A social life cycle assessment model for building construction in Hong Kong | 2015 | INTERNATIONAL JOURNAL OF LIFE CYCLE ASSESSMENT | Dong, YH and Ng, ST |
| 157 | Type I Social Life Cycle Assessments: Methodological Challenges in the Study of a Plant in the Context of Circular Economy | 2022 | SUSTAINABILITY | Tsalidis, GA |
| 158 | Visualization of the Sustainability Level of Crude Palm Oil Production: A Life Cycle Approach | 2021 | SUSTAINABILITY | Omran, N and Sharaai, AH and Hashim, AH |
| 159 | Innovation strategies in a fruit growers association impacts assessment by using combined LCA and s-LCA methodologies | 2016 | SCIENCE OF THE TOTAL ENVIRONMENT | Tecco, N and Baudino, C and Girgenti, V and Peano, C |
| 160 | Applying multi-criteria decision-making on alternatives for earth-retaining walls: LCA, LCC, and S-LCA | 2020 | INTERNATIONAL JOURNAL OF LIFE CYCLE ASSESSMENT | Balasbaneh, AT and Marsono, AKB |
| 161 | Greenwashing tobacco-attempts to eco-label a killer product | 2019 | JOURNAL OF ENVIRONMENTAL STUDIES AND SCIENCES | Houghton, F and Houghton, S and O'Doherty, D and McInerney, D and Duncan, B |
| 162 | Social Life Cycle Assessment: Specific Approach and Case Study for Switzerland | 2018 | SUSTAINABILITY | Lobsiger-Kagi, E and Lopez, L and Kuehn, T and Roth, R and Carabias, V and Zipper, C |
| 163 | Social Aspects in the Wine Sector: Comparison between Social Life Cycle Assessment and VIVA Sustainable Wine Project Indicators | 2019 | RESOURCES-BASEL | Martucci, O and Arcese, G and Montauti, C and Acampora, A |
| 164 | Different paths in social life cycle impact assessment (S-LCIA)-a classification of type II impact pathway approaches | 2020 | INTERNATIONAL JOURNAL OF LIFE CYCLE ASSESSMENT | Sureau, S and Neugebauer, S and Achten, WMJ |
| 165 | Social life cycle assessment for material selection: a case study of building materials | 2014 | INTERNATIONAL JOURNAL OF LIFE CYCLE ASSESSMENT | Hosseinijou, SA and Mansour, S and Shirazi, MA |
| 166 | Enriching the results of screening social life cycle assessment using content analysis: a case study of sugarcane in Brazil | 2019 | INTERNATIONAL JOURNAL OF LIFE CYCLE ASSESSMENT | Du, CY and Ugaya, C and Freire, F and Dias, LC and Clift, R |
| 167 | Social Life Cycle Assessment of a Concentrated Solar Power Plant in Spain: A Methodological Proposal | 2017 | JOURNAL OF INDUSTRIAL ECOLOGY | Corona, B and Bozhilova-Kisheva, KP and Olsen, SI and San Miguel, G |
| 168 | Environmental and social life cycle assessment of bamboo bicycle frames made in Ghana | 2017 | JOURNAL OF CLEANER PRODUCTION | Agyekum, EO and Fortuin, KPJ and van der Harst, E |
| 169 | Robust multi-criteria weighting in comparative LCA and S-LCA: A case study of sugarcane production in Brazil | 2019 | JOURNAL OF CLEANER PRODUCTION | Du, CY and Dias, LC and Freire, F |
| 170 | Social and Environmental Assessment of a Solidarity Oriented Energy Community: A Case-Study in San Giovanni a Teduccio, Napoli (IT) | 2022 | ENERGIES | Kaiser, S and Oliveira, M and Vassillo, C and Orlandini, G and Zucaro, A |
| 171 | Social impact and social performance of paddy rice production in Iran and Malaysia | 2022 | INTERNATIONAL JOURNAL OF LIFE CYCLE ASSESSMENT | Kalvani, SR and Sharaai, AH and Masri, MF and Yunus, NFM and Afendi, MR and Uchechukwu, OB |
| 172 | Comparative Social Life Cycle Assessment of Two Biomass-to-Electricity Systems | 2021 | INTERNATIONAL JOURNAL OF ENVIRONMENTAL RESEARCH AND PUBLIC HEALTH | Martin-Gamboa, M and Quinteiro, P and Dias, AC and Iribarren, D |
| 173 | Monetisation of external socio-economic costs of industrial production: A social-LCA-based case of clothing production | 2017 | JOURNAL OF CLEANER PRODUCTION | van der Velden, NM and Vogtlander, JG |
| 174 | Social impacts and life cycle assessment: proposals for methodological development for SMEs in the European food and drink sector | 2014 | INTERNATIONAL JOURNAL OF LIFE CYCLE ASSESSMENT | Smith, J and Barling, D |
| 175 | Costructal law, exergy analysis and life cycle energy sustainability assessment: an expanded framework applied to a boiler | 2020 | INTERNATIONAL JOURNAL OF LIFE CYCLE ASSESSMENT | Guarino, F and Cellura, M and Traverso, M |
| 176 | The challenge of incorporating animal welfare in a social life cycle assessment model of European chicken production | 2019 | INTERNATIONAL JOURNAL OF LIFE CYCLE ASSESSMENT | Tallentire, CW and Edwards, SA and Van Limbergen, T and Kyriazakis, I |
| 177 | A Regional Socio-Economic Life Cycle Assessment of a Bioeconomy Value Chain | 2020 | SUSTAINABILITY | Jarosch, L and Zeug, W and Bezama, A and Finkbeiner, M and Thran, D |
| 178 | Modeling the environmental and social impacts of the handloom industry in Bangladesh through life cycle assessment |  | MODELING EARTH SYSTEMS AND ENVIRONMENT | Mahiat, T and Al Alam, MA and Argho, M and Corlett, J and Chowdhury, RB and Biswas, KF and Hossain, MM and Sujauddin, M |
| 179 | Financial Modelling Strategies for Social Life Cycle Assessment: A Project Appraisal of Biodiesel Production and Sustainability in Newfoundland and Labrador, Canada | 2018 | SUSTAINABILITY | Sajid, Z and Lynch, N |
| 180 | The distinctive recognition of culture within LCSA: realising the quadruple bottom line | 2018 | INTERNATIONAL JOURNAL OF LIFE CYCLE ASSESSMENT | Pizzirani, S and McLaren, S and Forster, M and Pohatu, P and Porou, T and Warmenhoven, T |
| 181 | Development of the Social Inventory Database in Thailand Using Input-Output Analysis | 2015 | SUSTAINABILITY | Papong, S and Itsubo, N and Malakul, P and Shukuya, M |
| 182 | Integrating Individual Behavior Dimension in Social Life Cycle Assessment in an Energy Transition Context | 2020 | ENERGIES | Tsalidis, GA |
| 183 | Multi-dimensional Sustainability Evaluation of Indigo Rope Dyeing with a life cycle approach and hesitant fuzzy analytic hierarchy process | 2021 | JOURNAL OF CLEANER PRODUCTION | Fidan, FS and Aydogan, EK and Uzal, N |
| 184 | Building a Sustainability Benchmarking Framework of Ceramic Tiles Based on Life Cycle Sustainability Assessment (LCSA) | 2019 | RESOURCES-BASEL | Ferrari, AM and Volpi, L and Pini, M and Siligardi, C and Garcia-Muina, FE and Settembre-Blundo, D |
| 185 | Cause-effect chains in S-LCA based on DPSIR framework using Markov healthcare model: an application to "working hours" in Canada | 2021 | INTERNATIONAL JOURNAL OF LIFE CYCLE ASSESSMENT | Hannouf, MB and Assefa, G and Hannouf, MB and Gates, I |
| 186 | Definition, assessment and prioritisation of strategies to mitigate social life cycle impacts across the supply chain of bioelectricity: A case study in Portugal | 2022 | RENEWABLE ENERGY | Martin-Gamboa, M and Dias, AC and Iribarren, D |
| 187 | Life-cycle sustainability assessment of pavement maintenance alternatives: Methodology and case study | 2019 | JOURNAL OF CLEANER PRODUCTION | Zheng, XY and Easa, SM and Yang, ZX and Ji, T and Jiang, ZL |
| 188 | Assessing socio-economic value of innovative materials recovery solutions validated in existing wastewater treatment plants | 2021 | JOURNAL OF CLEANER PRODUCTION | Foglia, A and Bruni, C and Cipolletta, G and Eusebi, AL and Frison, N and Katsou, E and Akyol, C and Fatone, F |
| 189 | A socio-eco-efficiency analysis of water and wastewater treatment processes for refugee communities in Jordan | 2021 | RESOURCES CONSERVATION AND RECYCLING | Anwar, SNBM and Alvarado, V and Hsu, SC |
| 190 | Efficient Assessment of Social Hotspots in the Supply Chains of 100 Product Categories Using the Social Hotspots Database | 2014 | SUSTAINABILITY | Norris, CB and Norris, GA and Aulisio, D |
| 191 | A protocol for the definition of supply chains in product social life cycle assessment: application to bioelectricity | 2020 | SUSTAINABLE ENERGY & FUELS | Martin-Gamboa, M and Dias, AC and Arroja, L and Iribarren, D |
| 192 | Assessment of social aspects across Europe resulting from the insertion of technologies for nutrient recovery and recycling in agriculture | 2022 | SUSTAINABLE PRODUCTION AND CONSUMPTION | Andrade, EP and Bonmati, A and Esteller, LJ and Vallejo, AA |
| 193 | Social life cycle assessment of brine treatment and recovery technology: A social hotspot and site-specific evaluation | 2020 | SUSTAINABLE PRODUCTION AND CONSUMPTION | Tsalidis, GA and Gallart, JJE and Corbera, JB and Blanco, FC and Harris, S and Korevaar, G |
| 194 | Is there a place for culture in life cycle sustainability assessment? | 2014 | INTERNATIONAL JOURNAL OF LIFE CYCLE ASSESSMENT | Pizzirani, S and McLaren, SJ and Seadon, JK |
| 195 | Developing Life Cycle Sustainability Assessment methodology by applying values-based sustainability weighting - Tested on biomass based and fossil transportation fuels | 2018 | JOURNAL OF CLEANER PRODUCTION | Ekener, E and Hansson, J and Larsson, A and Peck, P |
| 196 | Application of Life Cycle Sustainability Assessment to Used Lubricant Oil Management in South Brazilian Region | 2021 | SUSTAINABILITY | Tsambe, MZA and de Almeida, CF and Ugaya, CML and Cybis, LFD |
| 197 | A novel social life cycle assessment method for determining workers' human development: a case study of the sugarcane biorefineries in Brazil | 2021 | INTERNATIONAL JOURNAL OF LIFE CYCLE ASSESSMENT | Souza, A and Watanabe, MDB and Cavalett, O and Cunha, M and Ugaya, CML and Bonomi, A |
| 198 | Assessing impacts of responsible sourcing initiatives for cobalt: Insights from a case study | 2021 | RESOURCES POLICY | Mancini, L and Eslava, NA and Traverso, M and Mathieux, F |
| 199 | Using Analytical Hierarchy Process (AHP) to Introduce Weights to Social Life Cycle Assessment of Mobility Services | 2021 | SUSTAINABILITY | Gompf, K and Traverso, M and Hetterich, J |
| 200 | Holistic life cycle approach for lightweight automotive components | 2014 | METALLURGICAL RESEARCH & TECHNOLOGY | Karakoyun, F and Kiritsis, D and Martinsen, K |
| 201 | A Framework to Evaluate the Social Life Cycle Impact of Products under the Circular Economy Thinking | 2022 | SUSTAINABILITY | Tsalis, T and Stefanakis, AI and Nikolaou, I |
| 202 | An Italian tomato "Cuore di Bue" case study: challenges and benefits using subcategory assessment method for social life cycle assessment | 2018 | INTERNATIONAL JOURNAL OF LIFE CYCLE ASSESSMENT | Petti, L and Ramirez, PKS and Traverso, M and Ugaya, CML |
| 203 | Comparative life cycle sustainability assessment of urban water reuse at various centralization scales | 2019 | INTERNATIONAL JOURNAL OF LIFE CYCLE ASSESSMENT | Opher, T and Friedler, E and Shapira, A |
| 204 | A study of social well-being among university students | 2022 | INTERNATIONAL JOURNAL OF LIFE CYCLE ASSESSMENT | Ma, SN and Sharaai, AH and Wafa, W |
| 205 | Municipal solid waste recycling network with sustainability and supply uncertainty considerations | 2022 | SUSTAINABLE CITIES AND SOCIETY | Harijani, AM and Mansour, S |
| 206 | Environmental and social life cycle assessment to enhance sustainability of sugarcane-based products in Thailand | 2019 | CLEAN TECHNOLOGIES AND ENVIRONMENTAL POLICY | Prasara-A, J and Gheewala, SH and Silalertruksa, T and Pongpat, P and Sawaengsak, W |
| 207 | Technology Selection Using the TOPSIS Method | 2020 | FORESIGHT AND STI GOVERNANCE | Halicka, K |
| 208 | CIRCULAR ECONOMY IN HIGHER EDUCATION INSTITUTIONS: LESSONS LEARNED FROM BRAZIL-COLOMBIA NETWORK | 2019 | BRAZILIAN JOURNAL OF OPERATIONS & PRODUCTION MANAGEMENT | Maruyama, U and Sanchez, PM and Trigo, AMG and Motta, WH |
| 209 | Identifying methodological challenges in the social risk assessment of cellulosic ethanol value chains | 2022 | JOURNAL OF INDUSTRIAL ECOLOGY | Vidaurre, NAM and Lewandowski, I and Lask, J |
| 210 | Analysis of Worker Category Social Impacts in Different Types of Concrete Plant Operations: A Case Study in South Korea | 2018 | SUSTAINABILITY | Roh, S and Tae, S and Kim, R and Martinez, DM |
| 211 | From Cascade to Bottom-Up Ecosystem Services Model: How Does Social Cohesion Emerge from Urban Agriculture? | 2018 | SUSTAINABILITY | Petit-Boix, A and Apul, D |
| 212 | Environmental and Social Impact Assessment of Optimized Post-Tensioned Concrete Road Bridges | 2020 | SUSTAINABILITY | Penades-Pla, V and Martinez-Munoz, D and Garcia-Segura, T and Navarro, IJ and Yepes, V |
| 213 | Social life cycle assessment based on input-output analysis of the Portuguese pulp and paper sector | 2022 | JOURNAL OF CLEANER PRODUCTION | Costa, D, and Quinteiro, P, and Pereira V, and Dias, A. C. |
| 214 | Social life cycle assessment of brine treatment in the process industry: a consequential approach case study | 2019 | SUSTAINABILITY | Tsalidis, G. A., and Korevaar, G. |
| 215 | A comparative social life cycle assessment of urban domestic water reuse alternatives | 2018 | INTERNATIONAL JOURNAL OF LIFE CYCLE ASSESSMENT | Opher, T., Shapira, A., and Friedler, E. |
| 216 | Application challenges for the social life cycle assessment of fertilizers within life cycle sustainability assessment | 2014 | JOURNAL OF CLEANER PRODUCTION | Martínez-Blanco, J, and Lehmann, A, and Muñoz, P, and Antón, A, and Traverso, M, and Rieradevall, J, and Finkbeiner, M |
| 217 | Social organizational life cycle assessment (SO-LCA) and Organization 4.0: An easy-to-implement Method | 2022 | METHODSX | García-Muiña, F, and Medina-Salgado, M. S, and González-Sánchez, R, and Huertas-Valdivia, I, and Ferrari, A. M, and Settembre-Blundo, D. |
| 218 | Organizational life cycle sustainability assessment (OLCSA) for a higher education institution as an organization: a systematic review and bibliometric analysis | 2022 | SUSTAINABILITY | Wafa, W, and Sharaai, A. H, and Matthew, N. K, and Ho, S. A. J, and Akhundzada, N. A. |
| 219 | A critical view on social performance assessment at company level: social life cycle analysis of an algae case | 2020 | INTERNATIONAL JOURNAL OF LIFE CYCLE ASSESSMENT | Rafiaani, P, and Kuppens, T, and Thomassen, G, and Van Dael, M, and Azadi, H, and Lebailly, P., and Van Passel, S. |
| 220 | What’s up and where to go in the development of the social life cycle impact assessment cause-effect model? | 2022 | INTERNATIONAL JOURNAL OF LIFE CYCLE ASSESSMENT | Ugaya, C, and de Araújo, J. B, and Souza, A, and do Carmo, B. B. T, and de Oliveira, S. A, and Maciel, V. G |
| 221 | A literature review of type I SLCA—making the logic underlying methodological choices explicit | 2018 | INTERNATIONAL JOURNAL OF LIFE CYCLE ASSESSMENT | Russo Garrido, S, and Parent, J, and Beaulieu, L., and Revéret, J. P. |
| 222 | Studying the Social Hotspots of 100 product categories with the Social Hotspots Database | 2014 | SUSTAINABILITY METRICS | Norris, C. B., and Norris, D. A. G. A |

Table 2: 31 topics and research objectives related to S-LCA, SO-LCA, methodological issues, and public service

| Research topics and objectives related to the S-LCA of products/services | | | | | |
| --- | --- | --- | --- | --- | --- |
| Nº | Authors | Year | Title | Objective | Journal |
| 1 | Costa, D et al. | 2022 | Social life cycle assessment based on input-output analysis of the Portuguese pulp and paper sector | Present the social risks and positive social impacts of the sector, which have not been widely covered in the scientific literature. | JOURNAL OF CLEANER PRODUCTION |
| 2 | Gompf, K et al. | 2021 | Using the analytical hierarchy process (AHP) to introduce weights to social life cycle assessment of mobility services | help decision-making by determining weightings for different criteria and indicators for evaluating the social sustainability of mobility services. | SUSTAINABILITY |
| 3 | Tsalidis, G.A. and Korevaar, G | 2019 | Social life cycle assessment of brine treatment in the process industry: a consequential approach case study | perform a consequential SLCA and investigate the applicability of the method in industrial decision-making | SUSTAINABILITY |
| 4 | Pillain, B et al. | 2019 | Social life cycle assessment framework for evaluation of potential job creation with an application in the French carbon fiber aeronautical recycling sector | Bringing in a significant amount of carbon fiber reinforced plastic (CFRP) products in the coming years at the end of their life cycle | INTERNATIONAL JOURNAL OF LIFE CYCLE |
| 5 | D'Eusanio, M et al. | 2018 | Assessment of social dimension of a jar of honey: A methodological outline | Presents a methodological framework to support decision-makers in evaluating the social sustainability of the Italian honey sector. | JOURNAL OF CLEANER PRODUCTION |
| 6 | Pelletier, N et al. | 2018 | Sustainability in trade and development policy | Assess the social risks associated with trade-based consumption in EU Member States using a life-cycle approach versus a non-life-cycle approach | INTERNATIONAL JOURNAL OF LIFE CYCLE ASSESSMENT |
| 7 | Opher, T. et al. | 2018 | A comparative social life cycle assessment of urban domestic water reuse alternatives | Compares the social benefits and impacts of four alternative approaches to the reuse of non-potable water for urban domestic use | INTERNATIONAL JOURNAL OF LIFE CYCLE ASSESSMENT |
| 8 | Lu, Y.-T et al. | 2017 | Inventory analysis and social life cycle assessment of greenhouse gas emissions from waste-to-energy incineration in Taiwan | Identify or raise key issues to be promoted for WtE incineration plants due to existing management systems and complex issues mixed with GHG, energy, and solid waste treatment. | SUSTAINABILITY |
| 9 | Martinez-Blanco, J et al. | 2014 | Application challenges for the social life cycle assessment of fertilizers within life cycle sustainability assessment | Explain and discuss the challenges encountered when applying the S-LCA in assessing the life cycle sustainability of environmental, economic, and social aspects related to two mineral fertilizers and one industrial compost | JOURNAL OF CLEANER PRODUCTION |
| 10 | Feschet, P et al. | 2013 | Social impact assessment in LCA using the Preston pathway: the case of the banana industry in Cameroon | build a pathway between changes in economic activity generated by the functioning of a product chain and the changes in the health status of the population in the country where the economic activity takes place. | INTERNATIONAL JOURNAL OF LIFE CYCLE ASSESSMENT |
| Research topics and research objectives related to the SO-LCA | | | | | |
| 1 | D'Eusanio, M et al. | 2022 | From social accountability 8000 (SA8000) to social organizational life cycle assessment (SO-LCA): an evaluation of the working conditions of an Italian wine-producing supply chain | Implement SO-LCA in a wine-growing organization based on a social organizational approach to working conditions previously assessed with SA8000 | SUSTAINABILITY |
| 2 | Osorio-Tejada, JL et al. | 2022 | Social organizational life cycle assessment of transport services: case studies in Colombia, Spain, and Malaysia | Analyze the social performance of companies involved in the supply chain of road transport companies located in different contexts such as Latin America, Europe, and Asia. | SUSTAINABILITY |
| 3 | D'Eusanio, M et al. | 2022 | Social organizational life cycle assessment and social life cycle assessment: different twins? correlations from a case study | Attempt to implement SO-LCA and correlation analysis between social life cycle assessment (S-LCA) and SO-LCA | INTERNATIONAL JOURNAL OF LIFE CYCLE ASSESSMENT |
| 4 | García-Muiña, F et al. | 2022 | Social organizational life cycle assessment (SO-LCA) and Organization 4.0: An easy-to-implement Method | Propose a simple application protocol of social organization life cycle analysis (SO-LCA), customized for an Italian ceramic tile manufacturer | METHODSX |
| 5 | Wafa, W et al. | 2022 | Organizational life cycle sustainability assessment (OLCSA) for a higher education institution as an organization: a systematic review and bibliometric analysis | focuses on a systematic review and bibliometric analysis of the OLCSA in the University | SUSTAINABILITY |
| 6 | Erauskin-Tolosa, A et al. | 2022 | Social organizational LCA for the academic activity of the University of the Basque Country UPV/EHU | Estimate the social footprint of a higher education institution (HEI) and its potential contribution to Sustainable Development Goals (SDGs) under the life cycle assessment (LCA) perspective | INTERNATIONAL JOURNAL OF LIFE CYCLE ASSESSMENT |
| 7 | Haryati, Z et al. | 2021 | Complementing social life cycle assessment to reach sustainable development goals - A case study from the Malaysian oil palm industry | Coping with the social impacts associated with the oil palm industry is through the social life cycle evaluation (ACV-S) | CHEMICAL ENGINEERING TRANSACTIONS |
| 8 | García-Muiña et al. | 2021 | Industry 4.0-based dynamic social organizational life cycle assessment to target the social circular economy in manufacturing | Integrate social organizational life cycle assessment (SO-LCA) and Industry 4.0 technologies in a blended methodological approach designed to dynamically monitor the social performance of a major manufacturing industry | JOURNAL OF CLEANER PRODUCTION |
| 9 | Rafiaani, P et al. | 2020 | A critical view on social performance assessment at company level: social life cycle analysis of an algae case | Assess the social impacts of a company working on algae production systems in Belgium through social life cycle analysis (SLCA | INTERNATIONAL JOURNAL OF LIFE CYCLE ASSESSMENT |
| 10 | Martinez-Blanco, J et al. | 2015 | Social Organizational LCA (SOLCA) a new approach for implementing social LCA | Propose a new organizational perspective to energize the SLCA - the social organizational LCA (SOLCA) | INTERNATIONAL JOURNAL OF LIFE CYCLE ASSESSMENT |
| Research topics and research objectives related to the methodological issues | | | | | |
| 1 | Ugaya, C et al. | 2022 | What’s up and where to go in the development of the social life cycle impact assessment cause-effect model? | Analyze the impact of the S-LCA by understanding its level of maturity for the identification of good practices and the limits of each characterization model. | INTERNATIONAL JOURNAL OF LIFE CYCLE ASSESSMENT |
| 2 | Tsalidis, GA | 2022 | Type I social life cycle assessments: methodological challenges in the study of a plant in the context of circular economy | The type I approach explores how S-LCA results of products made by circular systems can be interpreted. | SUSTAINABILITY |
| 3 | Do Carmo, BBT et al. | 2021 | Participatory approach for pertinent impact subcategory identification: Local community | Propose a method capable of modeling the subjectivity associated with the selection of impact sub-categories for the S-LCA through a stakeholder participatory approach. | INTERNATIONAL JOURNAL OF LIFE CYCLE ASSESSMENT |
| 4 | Vavra, J et al. | 2021 | S-LCA indicators as employee motivation factors | Identify S-LCA indicators as employee motivators for companies | EUROPEAN JOURNAL OF SUSTAINABLE DEVELOPMENT |
| 5 | Tokede, O and Traverso, M | 2020 | Implementing the guidelines for social life cycle assessment: past, present, and future | Present a critical review of the UNEP/SETAC (2009) guidelines for social life-cycle assessment (S-LCA) of products | INTERNATIONAL JOURNAL OF LIFE CYCLE ASSESSMENT |
| 6 | Russo Garrido, S et al. | 2018 | A literature review of type I SLCA—making the logic underlying methodological choices explicit | Takes on the task of exploring the evaluation methods used in type I SLCA methods | INTERNATIONAL JOURNAL OF LIFE CYCLE ASSESSMENT |
| 7 | Kühnen, M. and Hahn, R | 2017 | Indicators in social life cycle assessment: a review of frameworks, theories, and empirical experience | Systematically examine trends, consistencies, inconsistencies, and gaps in SLCA indicator research across industry sectors | JOURNAL OF INDUSTRIAL ECOLOGY |
| 8 | Ramirez, PKS et al. | 2016 | Subcategory assessment method for social life cycle assessment. Part 2: application in Natura’s cocoa soap | Propose an objective method for assessing subcategories in the Social Life Cycle Impact Assessment (S-LCIA) applied in Natura’s cocoa soap | INTERNATIONAL JOURNAL OF LIFE CYCLE ASSESSMENT |
| 9 | Ramirez, PKS et al. | 2014 | Subcategory assessment method for social life cycle assessment. Part 1: a methodological framework | Propose an objective method for evaluating subcategories in social life cycle impact assessment (S-LCIA) | INTERNATIONAL JOURNAL OF LIFE CYCLE ASSESSMENT |
| 10 | Norris, C et al. | 2014 | Studying the Social Hotspots of 100 product categories with the Social Hotspots Database | identify the social hotspots of 100 product categories in a few months, using a simplified approach | SUSTAINABILITY METRICS |
| Research topics related to Public Services | | | | | |
| **1** | Gompf K et al | 2022 | Applying Social Life Cycle Assessment to Evaluate the Use Phase of Mobility Services: A Case Study in Berlin | Analyze the social impacts of the use phase of mobility services in a holistic manner, considering both positive and negative impacts | INTERNATIONAL JOURNAL OF LIFE CYCLE ASSESSMENT |

Table 3: Identification of works presenting methodological approaches.

| **Title & Authors** | **Type of impact evaluation** | **Stakeholders’ categories identified** | **sub-categories identified** | **Indicators identified** |
| --- | --- | --- | --- | --- |
| Applying social life cycle assessment to evaluate the use phase of mobility services: a case study in Berlin (Gompf, K et al. 2022) | Reference scale approach (type I) | Local Community, Consumer, Worker, Value Chain Actors, Society | Public space, Air quality, Employment, Noise pollution, Community engagement, Space occupancy, Consumers   Accessibility, Safety, Convenience, Inclusiveness, Affordability, Privacy, Feedback mechanism, Worker   Safety, Fair salary, Discrimination,   Child labor,   Freedom of association and collective bargaining, Work-life balance, Forced labor,   Fair competition,   Intellectual property rights, Supplier relationships, Promoting social responsibility, Society   Health,   Urban Development,   Tax income | Green and open space per capita, Emission intensity of NOx, Emission intensity of PM10, Emission intensity of PM2.5, Emission intensity of SO2, Percentage of employees hired, Percentage of employees hired locally, Noise pollution greater than 65 dB, Average emissions of noise, Degree of population participation, Infrastructure efficiency, Infrastructure space occupancy, Space occupancy in relation to green and open space, Number of transport points, Number of passengers, Fatal and non-fatal traffic accidents, Punctuality of delivery, Inclusive design (ageing and disabled), Trip fare, Data privacy, Consumer complaint, Fatal and non-fatal injuries, Remuneration, Minimum wage paid, Prevention of discrimination, Prevention of child labor, Freedom of association and collective bargaining, Healthy work-life balance, Prevention of forced labor, Fair competitive activities, Respect of Intellectual Property Rights, Purchasing behavior, Social responsibility support, Percentage of audited suppliers, GWP100 [CO2 equiv.], Acidification potential [SO2 equiv.], Eutrophication potential [PO4 equiv.], Urban development plans, Taxes per pk. |
| Inventory Analysis and Social Life Cycle Assessment of Greenhouse Gas Emissions from Waste-to-Energy Incineration in Taiwan (Lu, Y.-T et al. 2017) | Risk assessments: Methods from the 2006 IPCC Guidelines to GHG | Local community, Value Chain Actors, Workers, Society, Governmental Authorities, waste-to-energy incineration industry, waste generators, environmental organizations | Community engagement, access to immaterial resources, and access to material resources, Promoting social responsibility, social benefit/social security, operation patterns, public commitment to sustainability issues, contribution to economic development, and technology development. | Several jobs created, accident rates, community, hours of education and training, involvement, local community and organizations, t Transparency of government policymaking, Presence/strength of community education, Awareness of climate change and GHG emissions, GHG reduction, and renewable energy certification, income generated, certified environmental and energy management system, local waste incineration, Investments in technologies, Contribution of GHG reduction credit, electricity power, and renewable energy certification to a circular economy. |
| Social organizational LCA for the academic activity of the University of the Basque Country UPV/EHU (Erauskin-Tolosa, A et al. 2021) | Risk assessments: PSILCA-based Soca add-on for the Ecoinvent v3.3 database | Workers, Local Community, Society, Value Chain Actors, Faculty members students, administrative staff, government and regulatory bodies, employers and business partners, researchers, and academics | Child labor, forced labor, fair salary, Working time, Discrimination, Health, and safety, social benefits, legal issues, Workers’ rights, Access to material resources, Respect for indigenous rights, Safe and healthy living conditions, Local employment, Migration, Contribution to economic development, Fair competition, Corruption, Access and equity, Community engagement and development, Intellectual property, and innovation | Child labor female, Child labor male, Child labor, total, frequency of forced labor, Goods produced by forced labor, Tracking in persons, Living wage (per month), Minimum wage (per month), Sector average wage (per month), Weekly hours of work per employee, Gender wage gap, Fatal accidents, Non-fatal accidents, Workers affected by natural disasters, social security expenditures, Violations of employment laws and regulations, Trade unionism, Right of association, Right of collective bargaining, Right to strike, Level of industrial water use, Extraction of biomass (related to population), Human rights issues faced by indigenous people, Presence of indigenous population, Sanitation coverage, Drinking water coverage, Unemployment, Net migration, International migrant, International migrant workers, Public expenditure on education, Illiteracy rate, female, Illiteracy rate, male, Illiteracy rate, Youth illiteracy rate, female, Youth illiteracy rate, male, Youth illiteracy rate, total, Health expenditure, external resources, Anti-competitive behavior or violation of anti-trust and monopoly legislation, Active involvement of enterprises in corruption and bribery |
| Social Organizational Life Cycle Assessment and Social Life Cycle Assessment: Different Twins? Correlations from a case study (D'Eusanio, M et al. 2022) | Reference scale approach (type I) | Workers, Local Community, Consumers, Value Chain Actors | Freedom of Association and Collective Bargaining, Child Labor, Working Hours, Forced Labor, Equal Opportunities/Discrimination, Health, and Safety, Fair Salary, Social benefits/Social Security, Consumer Privacy, Health, and Safety, Feedback Mechanism, Transparency, End- of- life Responsibility, Access to Material Resources, Access to Immaterial Resources, Cultural Heritage, Safety and Healthy Living Conditions, Community Engagement, Local Employment, Secure Living Conditions, Fair Competition, Respect of Intellectual Property Rights | Workers are free to join unions of their choosing, Workers are not conditioned by any restriction to collective bargaining, Presence of working children under the legal age, Presence of a policy in the organization to avoid the child labor, Average weekly working hour, The absence of forced labor, Presence of a policy against forced labor, Presence of a management system, policy, or actions to prevent discrimination and promote equal opportunities for workers, Presence of a policy, guidelines, or program concerning health and safety, Presence of social benefits provided to the workers (e.g., health insurance, pension fund, child care, education, accommodation etc.), Presence of a policy to protect consumer privacy, Adoption of measures to protect consumers’ health and safety, Presence of mechanisms for receiving customers’ feedback, Adoption of Corporate Social Responsibility (CSR) approaches (e.g., GRI, SA8000, ISO 26000), Different evidence of social responsibility communication, Presence of an internal management system to communicate end-of-life options, Possibility of a recycling the product, Presence of internal management systems for promoting community services and/or sharing knowledge, Technological readiness score of Italy, Evidence of contribution to cultural heritage, Presence of an environmental risk management system, Evidence of communication about potential impacts on health and safety of the organization’s activities, Evidence of the importance given to the environment and welfar, Evidence that local community was affected by the organization’s activities within the last 3 years, Evidence of equal employment opportunities for local workers, Evidence of conflicts with the local community, Evidence that organizational activities can represent a risk for secure living conditions, Evidence of fair competition and in compliance with anti-trust legislation, or monopoly practices, Evidence of respect for intellectual property |
| Complementing social life cycle assessment to reach sustainable development goals - A case Study from the Malaysian oil palm industry (Haryati, Z et al. 2022) | Reference scale approach (type I) with performance reference point (PRP) approach. | Workers, Consumers, Local communities, government, producers, NGOs, investors, suppliers, international organizations, | Child labor, forced labor, Health, and Safety, Social benefits/ social security, Fair salary, working hours, Health and safety, human rights, community rights, land use, and resettlement, labor and working conditions, local economy and employment, indigenous peoples' rights, Poverty and income distribution, social capital, and empowerment, gender equality and women's rights | Existence of child labor policy Child in the organization, Document retention Restriction of movement, Formal policy of safety and health, Training program, Safety working equipment, Safety and health records, Leaves and holidays, worker accommodation, retirement, medical benefits, worker accommodation, other benefits, paid below, minimum wage rate, late wage payment, schedule of wage paid, Working hours per week |
| A critical view on social performance assessment at company level: social life cycle analysis of an algae case (Rafiaani, P et al. 2020) | Performance reference points (PRPs) method | workers, consumers, and local community | Fair salary, Fair salary for workers, Health, and safety of workers, Equal opportunities/- discrimination for workers, Safe and healthy living conditions, Secure living conditions, Local employment, End of life responsibility of consumers, Transparency of the company, Consumers’ health, and safety | Fair wages for workers, the average number of workdays lost per worker per year, Rate of female to male employees, Control measures for maintenance operations involving hazardous substances, Number of injuries per year associated with the company conditions, Percentage of the workforce hired locally, Clear information provided by internal management systems to consumers on end-of-life options, Certification/label the company obtained for the product/site, Quality of labels of health and safety requirements |
| Social Sustainability in Trade and Development Policy (Pelletier, N et al. 2018) | Risk assessments: Eurostat ComEx import data at the HS06 level, Global Trade Analysis Project, sector codes, Social Hotspots Database (SHDB) | workers and producers, consumers and citizens, and private sector companies. | working conditions, working hours, social inclusion, health and safety, wages, job creation, income distribution, resource use, pollution, and climate change | Labor standards and conditions, gender equality, community empowerment, land, and resource rights. |
| Social life cycle assessment framework for evaluation of potential job creation with an application in the French carbon fiber aeronautical recycling sector (Pillain, B et al. 2019) | Risk assessments: Social Hotspots Database (SHDB) | local communities, employees, companies, investors, suppliers, regulators, consumers, NGOs | Social Inclusion and diversity (inclusion of disadvantaged groups, impacts on local communities, gender, and ethnic diversity).  Job creation (quantity and quality of jobs created, local employment, working conditions, training, and development opportunities). | Type of employment, Number of direct and indirect jobs created or maintained, Investment in local infrastructure and services, Presence of collective agreements or workplace organizations, Health and safety policies and records, Demographics of the workforce, Education and training opportunities for employees, Contribution to the local economy. |
| Social Organizational Life Cycle Assessment of Transport Services: Case Studies in Colombia, Spain, and Malaysia (Osorio-Tejada, JL et al. 2022) | Reference scale approach (type I) | local communities, Transport service providers, commuters & passengers, non-governmental organizations (NGOs), government/regulatory authorities, suppliers, and manufacturers of transport-related goods and services | Child labor, forced labor, equal opportunities, freedom of association, fair salary, fair work hours, health and safety at work, social benefits, transparency on social issues, the confidentiality of customer info, feedback mechanisms, delocalization and migration, respect for local traditions, respect for indigenous rights, community involvement, healthy and safe living, access to material resources, access to intangible resources, creation of local employment, contribution to the economy, prevention of armed conflicts, technological development, corruption, commitment on sustainability, suppliers relationship, unfair competition | Safety (frequency of vehicle breakdowns and crashes); Health( incidence of road accidents and air pollution-related health problems); Mobility (travel time and reliability of transport services); Accessibility (distance to public transportation and availability of information for commuters); Economic ( affordability and accessibility for low-income and marginalized communities); Sociocultural (impact on local culture and community dynamics); Environmental (carbon emissions and other pollutants generated by transport services). |
| Social organizational LCA (SOLCA)-a new approach for implementing social LCA (Martinez-Blanco, J et al. 2015) | Performance reference points (PRPs) method | Employees, local communities, customers, shareholders, suppliers | Social impacts, environmental impacts, economic impacts | Social indicators (Health and safety, culture and heritage, human rights, education and training, community involvement, labor rights, and equal opportunities).  Environmental indicators (greenhouse gas emissions, waste generation, Water consumption, hazardous waste, and air pollution).  Economic indicators (taxes paid, Income, wages, and benefits, economic value-added employment). |
